# Supplementary material for: Investigation of high-entropy Prussian blue analog as cathode material for aqueous sodium-ion batteries
Source: Royal Society of Chemistry journal article supplement (doi:10.1039/d3ta04349e), 2023-01-01
Supplement: d3ta04349e1.pdf [file d3ta04349e1.pdf]

## Supporting information

### Investigation of high-entropy Prussian blue analog as cathode materials for aqueous sodium-ion batteries

Xu Zhao<sup>1</sup>, Zhaohui Xing<sup>1</sup>, Chengde Huang\*

Department of Applied Chemistry, School of Chemical Engineering and Technology,  
Tianjin University, Tianjin, 300072, P.R. China

---

\* Corresponding author.  
E-mail address: [cdhuang@tju.edu.cn](mailto:cdhuang@tju.edu.cn) (C. Huang)

<sup>1</sup>These authors contributed equally to this work.

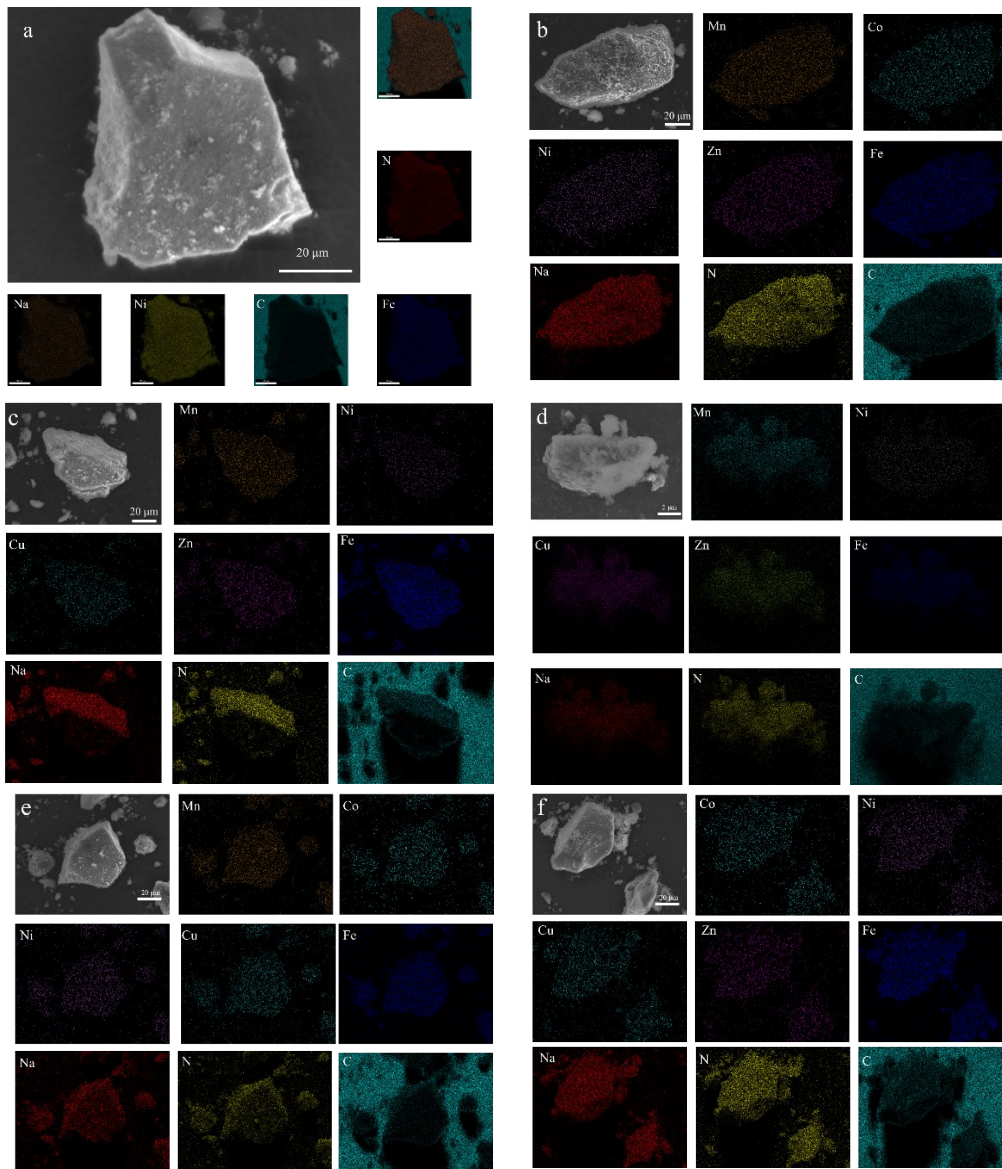

Figure S1 SEM and EDS element mapping of (a) NiHCF, (b) M4HCF-Cu, (c) M4HCF-Co, (d) M4HCF-Ni, (e) M4HCF-Zn, (f) M4HCF-Mn.

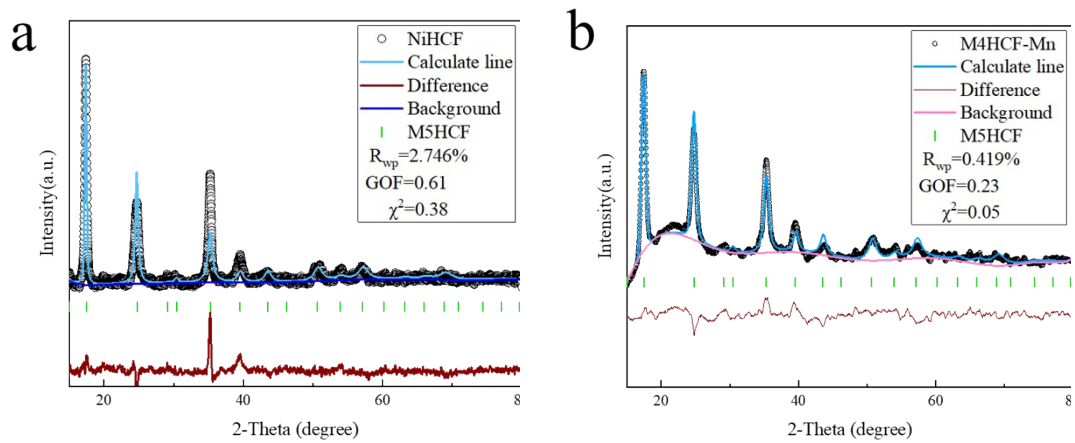

Figure S2 Rietveld refinement of the (a) NiHCF, and (b) M4HCF-Mn.

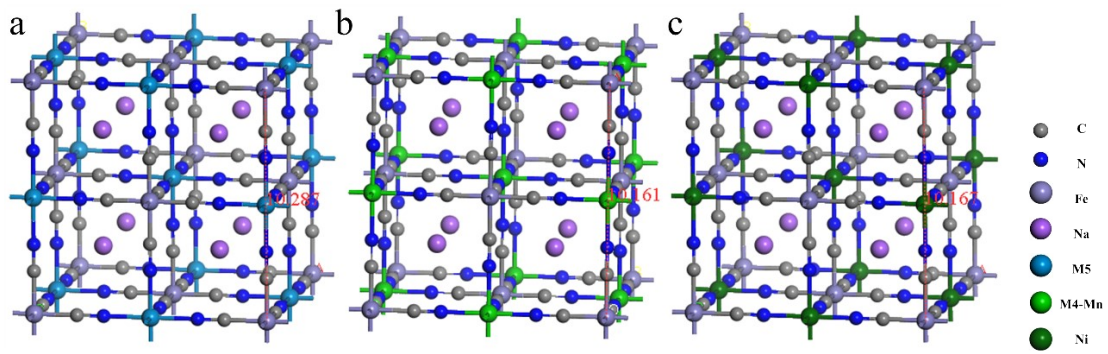

Figure S3 XRD refinement models of (a) M5HCF, (b) M4HCF-Mn, (c) NiHCF.

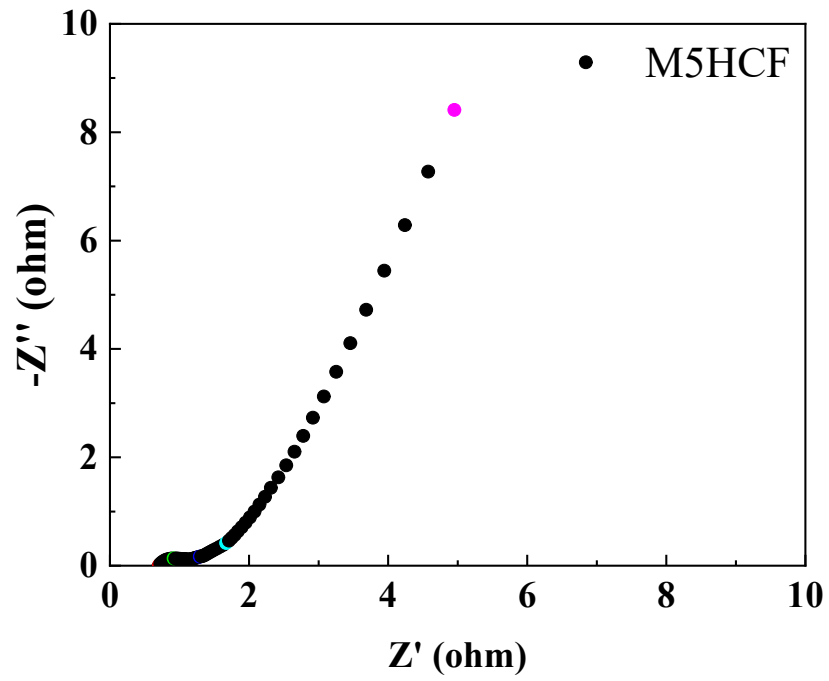

Figure S4 EIS spectrum of M5HCF.

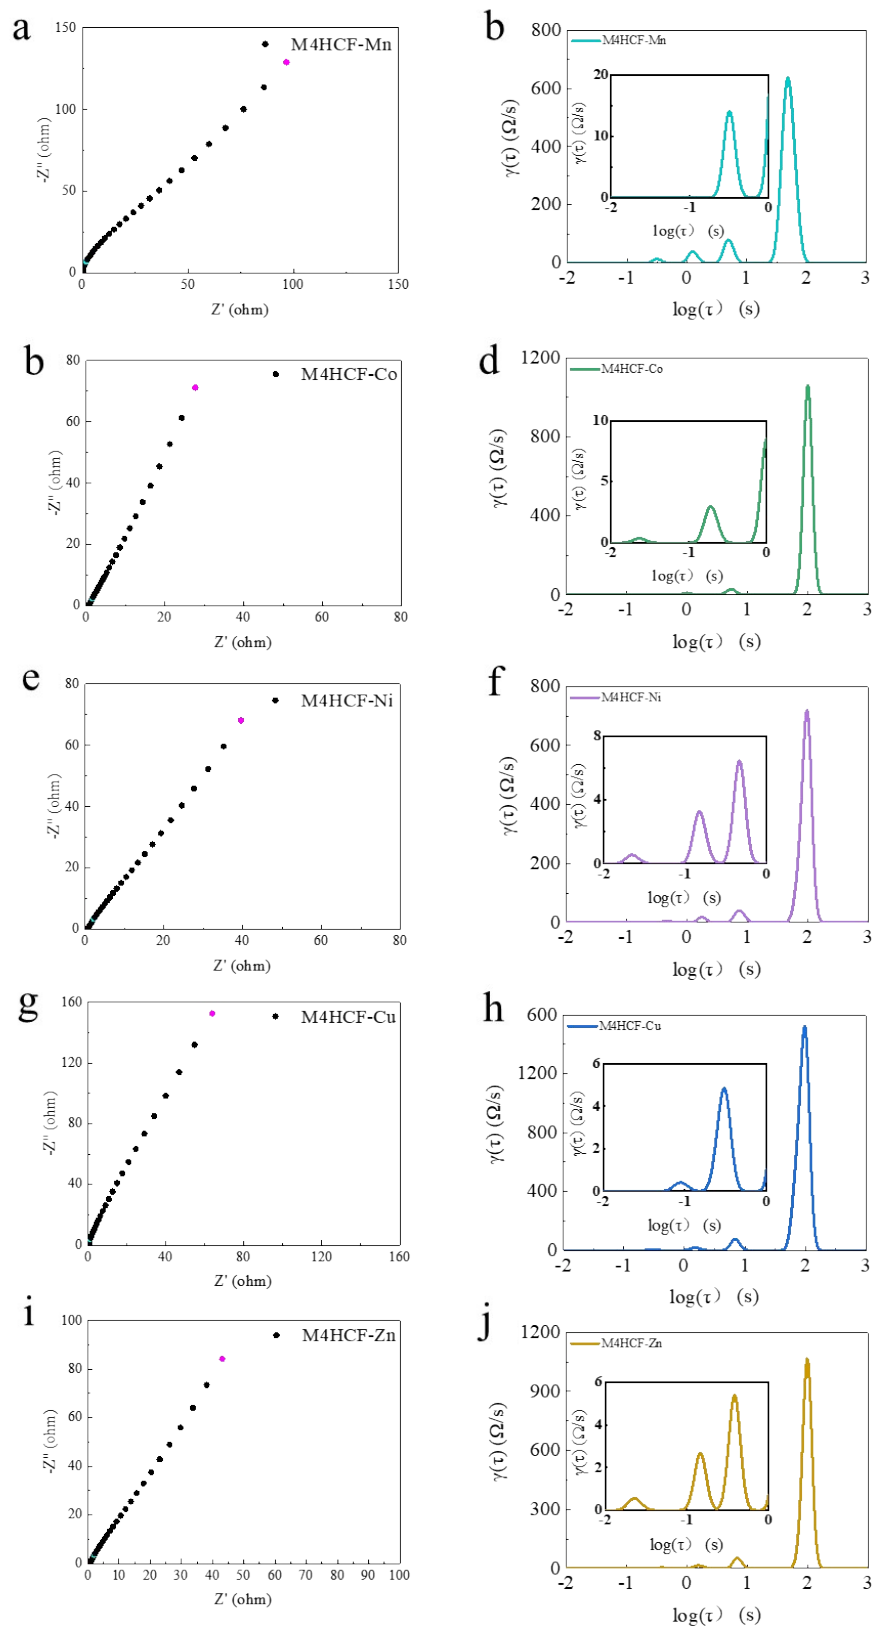

Figure S5 EIS spectra, relaxation time distribution analysis and local magnification of (a, b) M4HCF-Mn, (c, d) M4HCF-Co, (e, f) M4HCF-Ni, (g, h) M4HCF-Cu, (i, j) M4HCF-Zn.

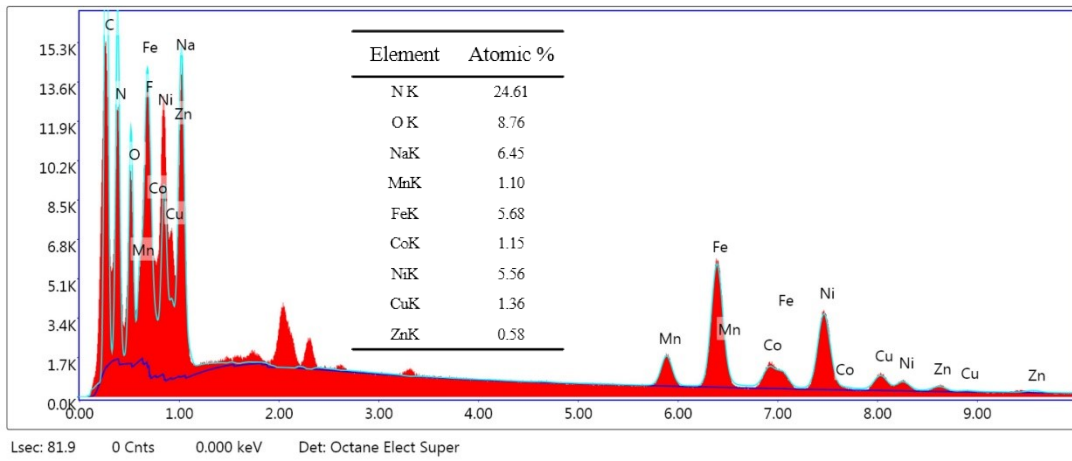

Figure S6 Sum Spectrum of EDS results for M5HCF.

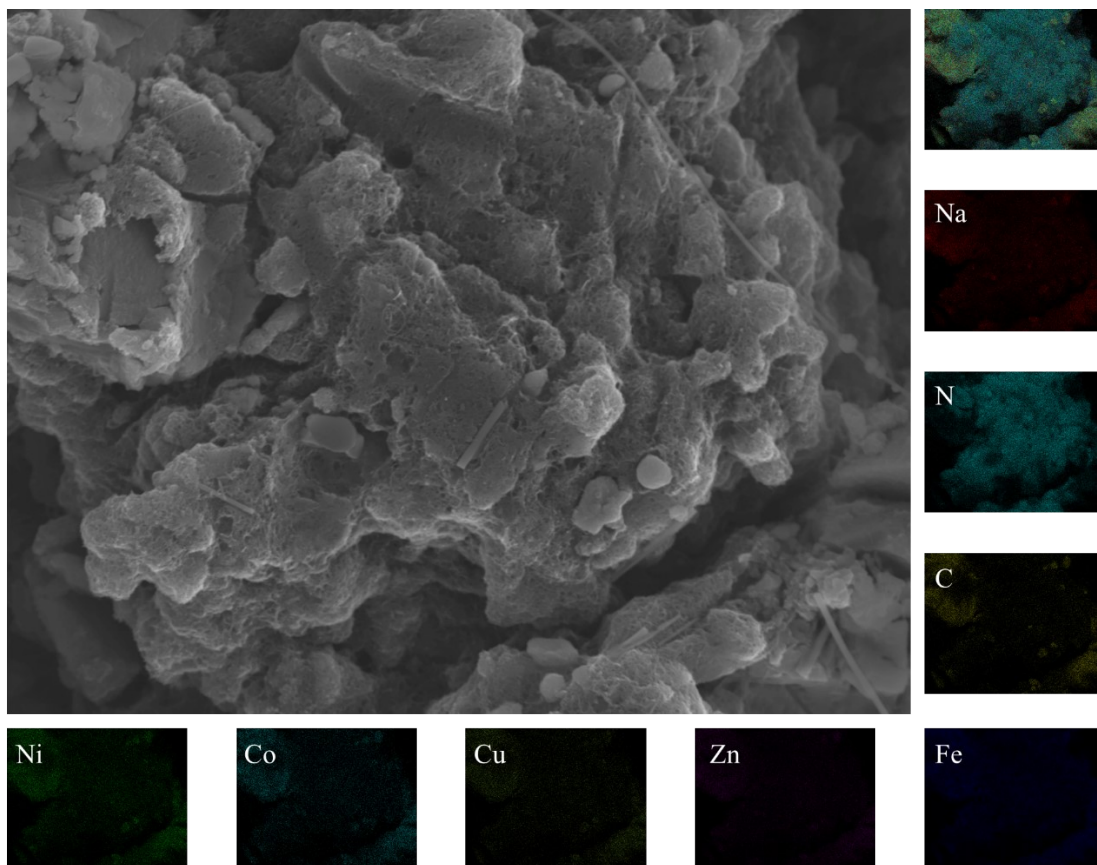

Figure S7 SEM image of and EDS mapping of M4HCF-Mn after 1000 cycles.



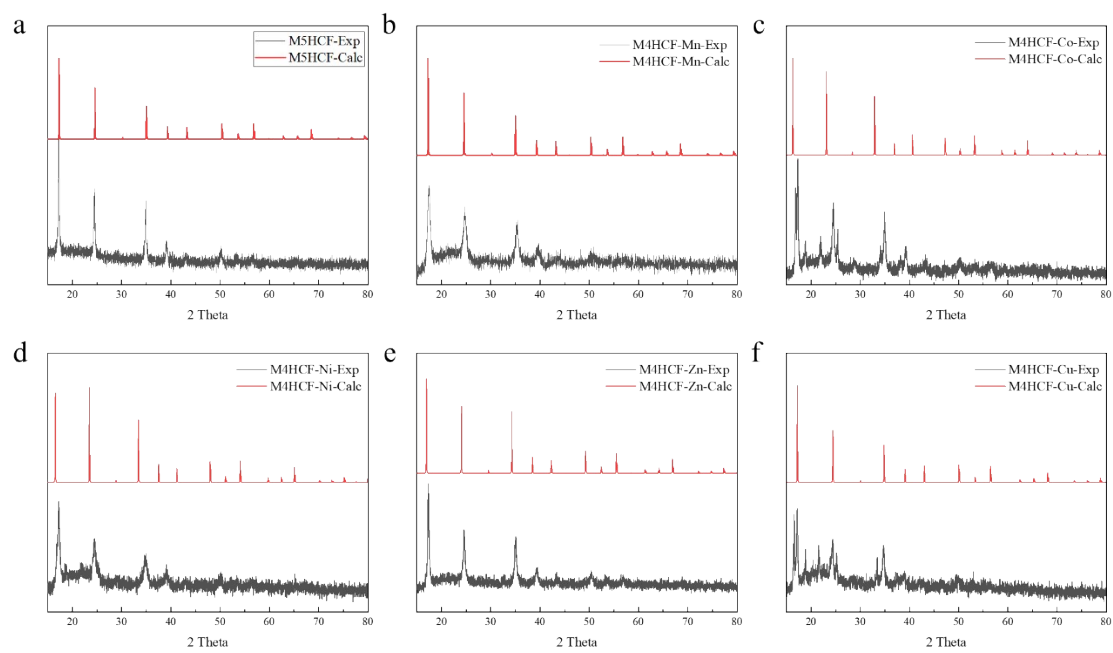

Figure S8 The comparisons of calculated XRD with experimental patterns for (a) M5HCF, (b-f) M4HCF.

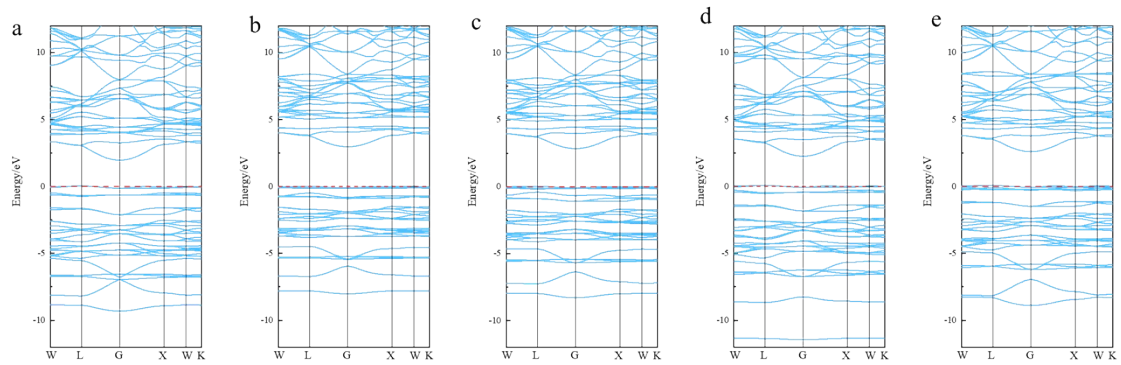

Figure S9 energy bands of (a) M4HCF-Mn, (b) M4HCF-Co, (c) M4HCF-Ni, (d) M4HCF-Cu, (e) M4HCF-Zn.

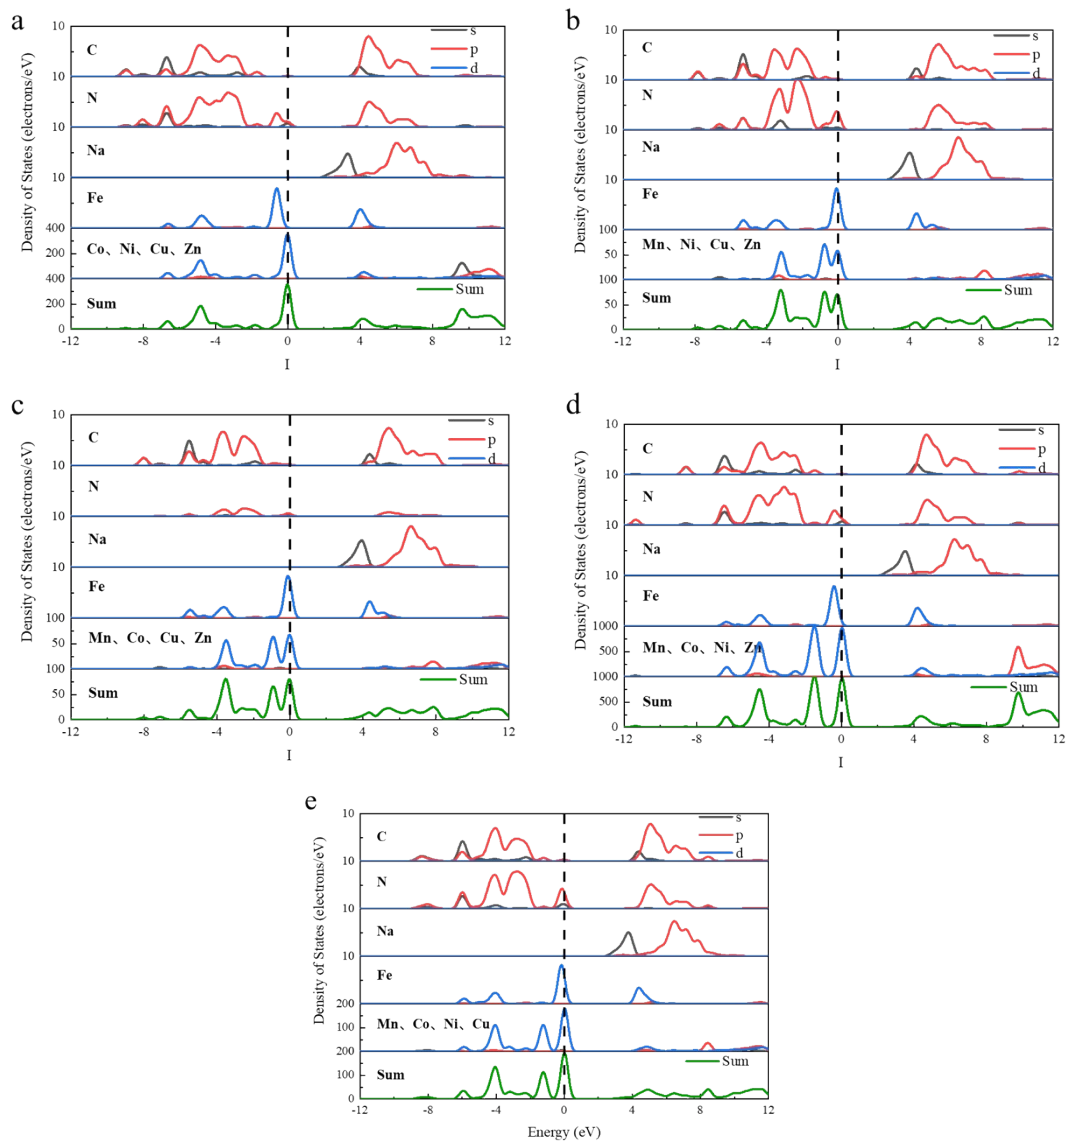

Figure S10 Total density of states, partial density of states plots of (a) M4HCF-Mn, (b) M4HCF-Co, (c) M4HCF-Ni, (d) M4HCF-Cu, (e) M4HCF-Zn.

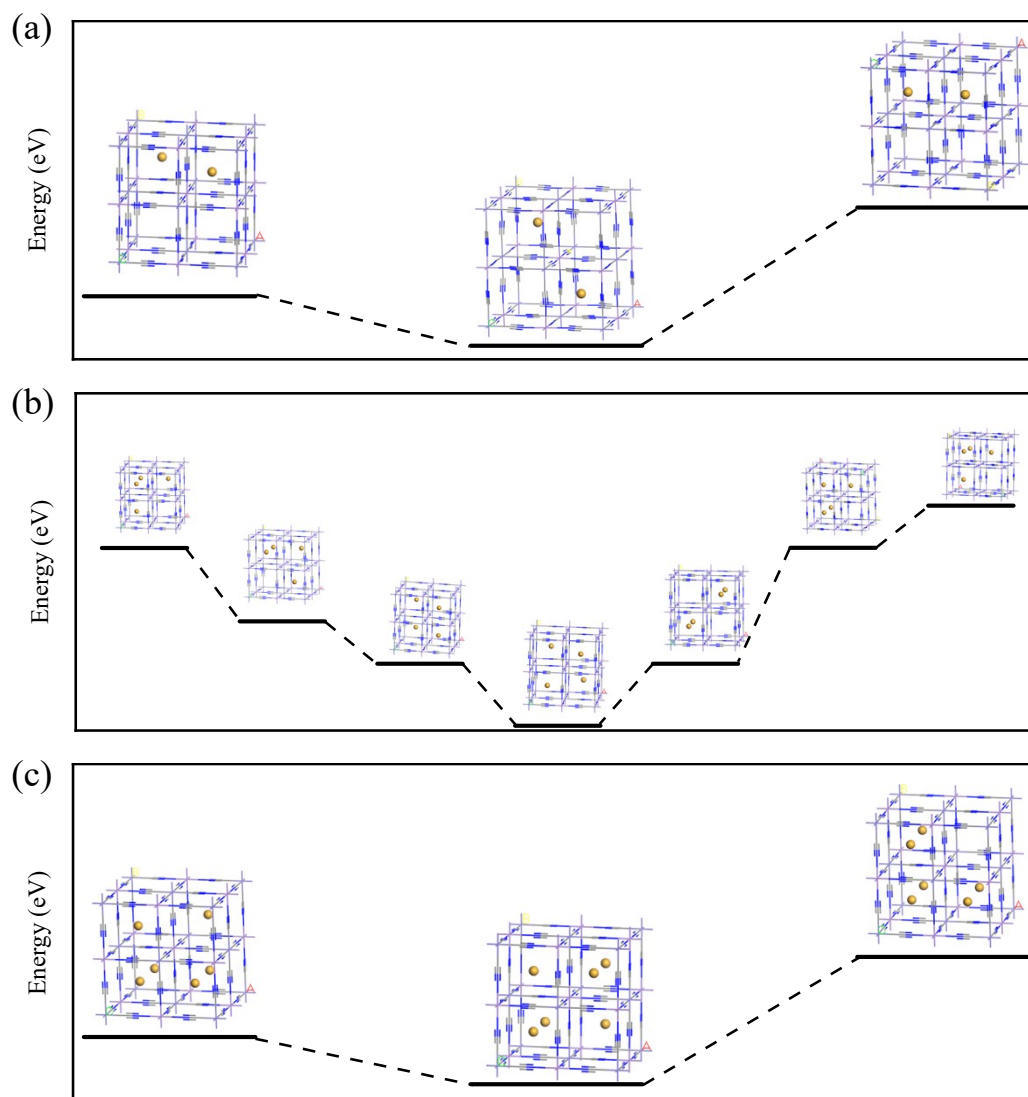

Figure S11 Binding energy relationship of (a)  $\text{Na}_{0.5}\text{M5Fe}(\text{CN})_6$ , (b)  $\text{NaM5Fe}(\text{CN})_6$ , (c)  $\text{Na}_{1.5}\text{M5Fe}(\text{CN})_6$ .

Table S1 ICP-OES results of element ratios for NiHCF, M5HCF and M4HCF-Mn.

|                                                                                                                                                                               | Na       | Fe       | Ni       | Mn       | Co       | Cu       | Zn       |
|-------------------------------------------------------------------------------------------------------------------------------------------------------------------------------|----------|----------|----------|----------|----------|----------|----------|
| NiHCF                                                                                                                                                                         | 1.231(2) | 0.792(3) | 0.813(2) | 0        | 0        | 0        | 0        |
| $\text{Na}_{1.23}\text{Ni}_{1.0}[\text{Fe}(\text{CN})_6]_{0.79}\square_{0.21}\cdot 1.13\text{H}_2\text{O}$                                                                    |          |          |          |          |          |          |          |
| M5HCF                                                                                                                                                                         | 1.193(2) | 1.125(3) | 0.185(4) | 0.191(3) | 0.182(3) | 0.212(2) | 0.234(2) |
| $\text{Na}_{1.19}(\text{Zn}_{0.23}\text{Mn}_{0.19}\text{Ni}_{0.19}\text{Cu}_{0.21}\text{Co}_{0.18})[\text{Fe}(\text{CN})_6]_{0.81}\square_{0.19}\cdot 1.15\text{H}_2\text{O}$ |          |          |          |          |          |          |          |
| M4HCF-Mn                                                                                                                                                                      | 1.196    | 0.782(2) | 0.250(3) | –        | 0.251(4) | 0.252(2) | 0.252(3) |
| $\text{Na}_{1.2}(\text{Zn}_{0.25}\text{Ni}_{0.25}\text{Cu}_{0.25}\text{Co}_{0.25})[\text{Fe}(\text{CN})_6]_{0.78}\square_{0.22}\cdot 1.15\text{H}_2\text{O}$                  |          |          |          |          |          |          |          |

Table S2 Element content of C, H and N for three samples (wt %)

|          | C      | H     | N      |
|----------|--------|-------|--------|
| NiHCF    | 19.678 | 2.276 | 20.365 |
| M5HCF    | 19.682 | 2.231 | 20.442 |
| M4HCF-Mn | 16.817 | 2.497 | 19.501 |

Table S3 Electrochemical performance of different element-doped PBAs cathode materials in aqueous sodium ion full cells

| PBAs cathode                              | Electrolyte                                                                 | Capacity/<br>(mAh/g) | Cycle<br>(Retention/%) | Ref.         |
|-------------------------------------------|-----------------------------------------------------------------------------|----------------------|------------------------|--------------|
| NiHCF@PPy                                 | 0.5M H <sub>2</sub> SO <sub>4</sub> +<br>0.2M Aniline                       | 73.6 (2 C)           | 300 (70%)              | [1]          |
| TiHCF                                     | 0.1M NaNO <sub>3</sub>                                                      | 30 (0.2 C)           | -                      | [2]          |
| CoHCF                                     | 1M Na <sub>2</sub> SO <sub>4</sub>                                          | 114 (0.1 A/g)        | 200 (83%)              | [3]          |
| Co <sub>0.97</sub> Zn <sub>0.03</sub> HCF | 1M NaNO <sub>3</sub>                                                        | 119 (0.1 A/g)        | 200 (74%)              | [4]          |
| VHCF@CuHCF                                | 0.5M Na <sub>2</sub> SO <sub>4</sub> +<br>5M H <sub>2</sub> SO <sub>4</sub> | 90 (1.2 C)           | 200 (90%)              | [5]          |
| NienHCF                                   | 0.5M Na <sub>2</sub> SO <sub>4</sub>                                        | 36.5 (0.1 A/g)       | 500 (60.7%)            | [6]          |
| MnHCF                                     | 17M NaClO <sub>4</sub>                                                      | 59 (5 C)             | 700 (75%)              | [7]          |
| M5HCF                                     | 1M Na <sub>2</sub> SO <sub>4</sub>                                          | 65.6 (1 C)           | 1000 (87.0%)           | This<br>work |

#### References

- [1] P. Naskar, S. Debnath, A. Maiti, B. Biswas, A. Banerjee, *Chemphyschem*, 2023, **24**, e202200588.  
<https://doi.org/10.1002/cphc.202200588>.
- [2] M. Li, A. Bina, M. Maisuradze, M. Giorgetti, *Batteries*, 2021, **8 (1)** : 1.  
<https://doi.org/10.3390/batteries8010001>
- [3] J. Kim, S-H. Yi, L. Li, T.V. Thu, S-E. Chun, *Int. J. Energy Res.*, 2022, **46 (15)**, 22717-22729.  
<https://doi.org/10.1002/er.8574>.
- [4] J. Kim, S-H. Yi, L. Li, S-E. Chun, *J. Energy Chem.*, 2022, **69**, 649-658.  
<https://doi.org/10.1016/j.jechem.2022.01.034>.
- [5] T-U. Choi, G. Baek, S.G. Lee, J-H. Lee, *ACS Appl. Mater. Interfaces*, 2020, **12, 22**, 24817–24826. <https://doi.org/10.1021/acsami.0c05458>.
- [6] D. Zhang, L. Sun, C. Wang, Q. Xue, J. Feng, W. Ran, T. Yan, *ACS Appl. Mater. Interfaces*, 2022, **14, 14**, 16197–16203. <https://doi.org/10.1021/acsami.2c00143>.
- [7] S. Qiu, X. Wu, M. Wang, M. Lucero, Y. Wang, J. Wang, Z. Yang, W. Xu, Q. Wang, M. Gu, J. Wen, Y. Huang, Z.J. Xu, Z. Feng, *Nano Energy*, 2019, **64**, 103941.  
<https://doi.org/10.1016/j.nanoen.2019.103941>.

Table S4 EDS results of two samples before and after cycling test (at.%)

|          |        | Na   | Mn  | Fe   | Co  | Ni  | Cu  | Zn  |
|----------|--------|------|-----|------|-----|-----|-----|-----|
| M5HCF    | before | 33.5 | 6.7 | 30.7 | 7.8 | 6.0 | 6.3 | 9   |
|          | after  | 63.1 | 2.4 | 38.1 | 0.9 | 7.7 | 2.2 | 2.3 |
| M4HCF-Mn | before | 29   | –   | 32   | 10  | 9   | 10  | 11  |
|          | after  | 45   | –   | 30   | 0   | 15  | 3.6 | 6.1 |

Table S5 Convergence test data for high and medium entropy doped PBAs

| Materials | Truncation energy/eV | k-point |
|-----------|----------------------|---------|
| M5HCF     | 780                  | 4×4×4   |
| M4HCF-Mn  | 750                  | 4×4×4   |
| M4HCF-Co  | 800                  | 4×4×4   |
| M4HCF-Ni  | 780                  | 5×5×5   |
| M4HCF-Cu  | 780                  | 4×4×4   |
| M4HCF-Zn  | 780                  | 3×3×3   |

Table S6 Energy formation and voltage plateau during discharging of M5HCF cathode material

| Materials                               | Binding energy $E_f$ /eV | Voltage plateau/V |
|-----------------------------------------|--------------------------|-------------------|
| FeM5(CN) <sub>6</sub>                   | —                        | —                 |
| Na <sub>0.5</sub> FeM5(CN) <sub>6</sub> | -1.29332                 | 2.58665           |
| NaFeM5(CN) <sub>6</sub>                 | -1.98945                 | 1.39225           |
| Na <sub>1.5</sub> FeM5(CN) <sub>6</sub> | -2.54984                 | 1.1208            |
| Na <sub>2</sub> FeM5(CN) <sub>6</sub>   | -2.90225                 | 0.7054            |
